# Supplementary material
Source: bioRxiv or medRxiv preprint supplement (https://medrxiv.org/highwire/filestream/71501/field_highwire_adjunct_files/0/2020.01.24.20018648-1.pdf)
Supplement: Supplementary file [file 2020.01.24.20018648-1.pdf]

Supplemental Table 1. Spearman's rank correlation for N= 73 between SRS, SPSRQ-C, resting pupil PD,  $A_D$ , and  $A_C$ 

|                | Age             | FSIQ                               | SRS Total                          | SRS SCI                            | RBRI                               | Social Awr                        | Social Cog                         | Social Com                         | Social Mot                         | SPSRQ-C Punish                     | SPSRQ-C Reward                | Resting PD                    | $A_D$                             | $A_C$     |
|----------------|-----------------|------------------------------------|------------------------------------|------------------------------------|------------------------------------|-----------------------------------|------------------------------------|------------------------------------|------------------------------------|------------------------------------|-------------------------------|-------------------------------|-----------------------------------|-----------|
| Age            | 1.00<br>-       |                                    |                                    |                                    |                                    |                                   |                                    |                                    |                                    |                                    |                               |                               |                                   |           |
| FSIQ           | -0.019<br>0.872 | 1.00<br>-                          |                                    |                                    |                                    |                                   |                                    |                                    |                                    |                                    |                               |                               |                                   |           |
| SRS Total      | -0.006<br>0.957 | <b>-0.347</b><br><b>0.002</b>      | 1.00<br>-                          |                                    |                                    |                                   |                                    |                                    |                                    |                                    |                               |                               |                                   |           |
| SRS SCI        | -0.010<br>0.929 | <b>-0.355</b><br><b>0.002</b>      | <b>0.990</b><br><b>&lt;0.0001</b>  | 1.00<br>-                          |                                    |                                   |                                    |                                    |                                    |                                    |                               |                               |                                   |           |
| RBRI           | 0.037<br>0.752  | <b>-0.340</b><br><b>0.003</b>      | <b>0.935</b><br><b>&lt;0.0001</b>  | <b>0.886</b><br><b>&lt;0.0001</b>  | 1.00<br>-                          |                                   |                                    |                                    |                                    |                                    |                               |                               |                                   |           |
| Social Awr     | -0.079<br>0.495 | <b>-0.287</b><br><b>0.012</b>      | <b>0.858</b><br><b>&lt;0.0001</b>  | <b>0.876</b><br><b>&lt;0.0001</b>  | <b>0.757</b><br><b>&lt;0.0001</b>  | 1.00<br>-                         |                                    |                                    |                                    |                                    |                               |                               |                                   |           |
| Social Cog     | 0.023<br>0.839  | <b>-0.406</b><br><b>&lt;0.0001</b> | <b>0.935</b><br><b>&lt;0.0001</b>  | <b>0.934</b><br><b>&lt;0.0001</b>  | <b>0.851</b><br><b>&lt;0.0001</b>  | <b>0.796</b><br><b>&lt;0.0001</b> | 1.00<br>-                          |                                    |                                    |                                    |                               |                               |                                   |           |
| Social Com     | 0.031<br>0.788  | <b>-0.342</b><br><b>0.003</b>      | <b>0.971</b><br><b>&lt;0.0001</b>  | <b>0.984</b><br><b>&lt;0.0001</b>  | <b>0.862</b><br><b>&lt;0.0001</b>  | <b>0.865</b><br><b>&lt;0.0001</b> | <b>0.912</b><br><b>&lt;0.0001</b>  | 1.00<br>-                          |                                    |                                    |                               |                               |                                   |           |
| Social Mot     | -0.023<br>0.842 | <b>-0.321</b><br><b>0.005</b>      | <b>0.882</b><br><b>&lt;0.0001</b>  | <b>0.881</b><br><b>&lt;0.0001</b>  | <b>0.805</b><br><b>&lt;0.0001</b>  | <b>0.699</b><br><b>&lt;0.0001</b> | <b>0.750</b><br><b>&lt;0.0001</b>  | <b>0.840</b><br><b>&lt;0.0001</b>  | 1.00<br>-                          |                                    |                               |                               |                                   |           |
| SPSRQ-C Punish | 0.034<br>0.778  | -0.127<br>0.287                    | <b>0.510</b><br><b>&lt;0.0001</b>  | <b>0.536</b><br><b>&lt;0.0001</b>  | <b>0.396</b><br><b>&lt;0.0001</b>  | <b>0.502</b><br><b>&lt;0.0001</b> | <b>0.480</b><br><b>&lt;0.0001</b>  | <b>0.520</b><br><b>&lt;0.0001</b>  | <b>0.549</b><br><b>&lt;0.0001</b>  | 1.00<br>-                          |                               |                               |                                   |           |
| SPSRQ-C Reward | 0.000<br>0.999  | 0.068<br>0.572                     | <b>0.254</b><br><b>0.030</b>       | <b>0.266</b><br><b>0.023</b>       | 0.192<br>0.104                     | <b>0.254</b><br><b>0.030</b>      | <b>0.260</b><br><b>0.027</b>       | <b>0.240</b><br><b>0.041</b>       | <b>0.288</b><br><b>0.011</b>       | <b>0.381</b><br><b>0.001</b>       | 1.00<br>-                     |                               |                                   |           |
| Resting PD     | -0.136<br>0.240 | -0.040<br>0.736                    | <b>0.282</b><br><b>0.014</b>       | <b>0.270</b><br><b>0.019</b>       | <b>0.285</b><br><b>0.013</b>       | 0.177<br>0.128                    | <b>0.271</b><br><b>0.019</b>       | <b>0.244</b><br><b>0.035</b>       | <b>0.281</b><br><b>0.015</b>       | 0.204<br>0.088                     | <b>0.360</b><br><b>0.002</b>  | 1.00<br>-                     |                                   |           |
| $A_D$          | 0.169<br>0.151  | <b>0.322</b><br><b>0.005</b>       | <b>-0.537</b><br><b>&lt;0.0001</b> | <b>-0.531</b><br><b>&lt;0.0001</b> | <b>-0.509</b><br><b>&lt;0.0001</b> | -0.480<br><b>&lt;0.0001</b>       | <b>-0.470</b><br><b>&lt;0.0001</b> | <b>-0.530</b><br><b>&lt;0.0001</b> | <b>-0.524</b><br><b>&lt;0.0001</b> | <b>-0.393</b><br><b>0.001</b>      | <b>-0.237</b><br><b>0.049</b> | -0.156<br>0.185               | 1.00<br>-                         |           |
| $A_C$          | 0.199<br>0.088  | <b>0.285</b><br><b>0.015</b>       | <b>-0.515</b><br><b>&lt;0.0001</b> | <b>-0.510</b><br><b>&lt;0.0001</b> | <b>-0.469</b><br><b>&lt;0.0001</b> | -0.477<br><b>&lt;0.0001</b>       | <b>-0.437</b><br><b>&lt;0.0001</b> | <b>-0.493</b><br><b>&lt;0.0001</b> | <b>-0.516</b><br><b>&lt;0.0001</b> | <b>-0.495</b><br><b>&lt;0.0001</b> | <b>-0.309</b><br><b>0.010</b> | <b>-0.351</b><br><b>0.002</b> | <b>0.825</b><br><b>&lt;0.0001</b> | 1.00<br>- |
